# Supplementary material
Source: PubMed Central journal article supplement (PMC2863174)
Supplement: supp_M109.087023_jbc.M109.087023-1.pdf [file supp_M109.087023_jbc.M109.087023-1.pdf]

**Mechanistic insight into the function of the C-terminal PKD domain of the collagenolytic serine protease deseasin MCP-01 from deep-sea *Pseudoalteromonas* sp. SM9913: Binding of the PKD domain to collagen results in collagen swelling but does not unwind the collagen triple helix**

Yu-Kai Wang<sup>1</sup>\*, Guo-Yan Zhao<sup>1</sup>\*, Yang Li<sup>1</sup>, Xiu-Lan Chen<sup>1</sup>, Bin-Bin Xie<sup>1</sup>, Hai-Nan Su<sup>1</sup>, Yao-Hui Lv<sup>2</sup>, Hai-Lun He<sup>1</sup>, Hong Liu<sup>2</sup>, Jun Hu<sup>3</sup>, Bai-Cheng Zhou<sup>1</sup>, Yu-Zhong Zhang<sup>1</sup>

<sup>1</sup> State Key Lab of Microbial Technology, Marine Biotechnology Research Center, Shandong University, Jinan 250100, P. R. China

<sup>2</sup> State Key Laboratory of Crystal Materials, Shandong University, Jinan 250100, P. R. China

<sup>3</sup> Shanghai Institute of Applied Physics, Chinese Academy of Sciences, PO Box 800-204, Shanghai 201800, P. R. China

Running title: PKD domain swells collagen but does not unwind the collagen triple helix

Address correspondence to: Yu-Zhong Zhang, State Key Lab of Microbial Technology, Marine Biotechnology Research Center, Shandong University, Jinan 250100, P. R. China. Tel: +86-531-88364326; Fax: +86-531-88564326. E-mail: [zhangyz@sdu.edu.cn](mailto:zhangyz@sdu.edu.cn)

## Supplementary Data

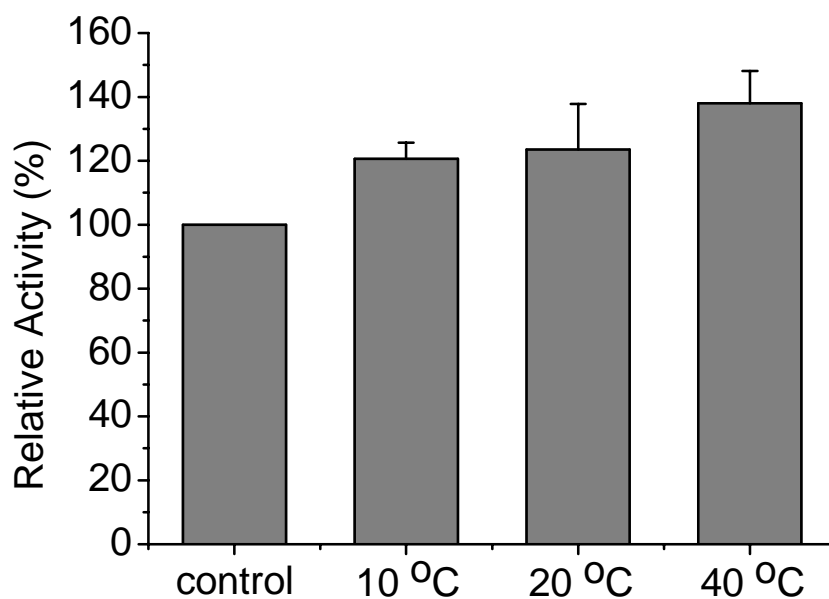

Fig. S1. Effect of PKD pretreatment at different temperatures on the collagenolytic efficiency of the catalytic domain of MCP-01. Insoluble type I collagen fiber (5 mg) was first incubated in the absence and presence of the PKD domain (1 nmol) in 50 mM Tris-HCl (with 0.36 mM CaCl<sub>2</sub>, pH 7.5) for 5 h at different temperatures, and then 200 pmol of the catalytic domain (CD) was added and further incubated for 5 h at 40 °C for activity assay. Enzyme activity was determined as mentioned in Experimental Procedures. Column 1: the activity of CD toward the collagen without PKD treatment; Column 2: the activity of CD toward the collagen pretreated with the PKD domain at 10 °C; Column 3: the activity of CD toward the collagen pretreated with the PKD domain at 20 °C; Column 4: the activity of CD toward the collagen pretreated with the PKD domain at 40 °C.
